# Supplementary material for: Solvatomorphism, polymorphism and spin crossover in bis[hydrotris(1,2,3-triazol-1-yl)borate]iron(ii)
Source: Royal Society of Chemistry journal article supplement (doi:10.1039/d2nj01471h), 2022-01-01
Supplement: d2nj01471h1.pdf [file d2nj01471h1.pdf]

## Supporting Information

### **Solvatomorphism, polymorphism and spin crossover in bis[hydrotris(1,2,3-triazol-1-yl)borate]iron(II)**

Oleksandr Ye. Horniichuk,<sup>ab</sup> Karl Ridier,<sup>b</sup> Gábor Molnár,<sup>b</sup> Volodymyr O. Kotsyubynsky,<sup>d</sup> Sergiu Shova,<sup>c</sup> Vladimir M. Amirkhanov,<sup>a</sup> Il'ya A. Gural'skiy,<sup>\*a</sup> Lionel Salmon,<sup>\*b</sup> Azzedine Bousseksou<sup>b</sup>

<sup>a</sup> *Taras Shevchenko National University of Kyiv, Faculty of Chemistry, 12, Lva Tolstogo str., 01033, Kyiv, Ukraine*

<sup>b</sup> *LCC, CNRS and Université de Toulouse (UPS, INP) 205 route de Narbonne, F-31077 Toulouse, France*

<sup>c</sup> *"Petru Poni" Institute of Macromolecular Chemistry, 41A Aleea Gr. Ghica Voda, 700487 Iasi, Romania*

<sup>d</sup> *Department of Material Science and New Technology, Vasyl Stefanyk Precarpathian National University, Ivano-Frankivsk 76018, Ukraine*

#### **I- Structural data**

#### **II- Raman Spectroscopy**

#### **III- Mössbauer specstroscopy**

#### **IV- References**

## I- Structural data

**Table S1.** Crystal data and structure refinement of solvatomorphs.

| Compound                                            | 1·2DMSO                                                       | 1·7DMSO                                                       | 1·2MeOH                                                       | 1·2CHCl <sub>3</sub>                                          | 1·2DMF·H <sub>2</sub> O                                       | 1                                                             |
|-----------------------------------------------------|---------------------------------------------------------------|---------------------------------------------------------------|---------------------------------------------------------------|---------------------------------------------------------------|---------------------------------------------------------------|---------------------------------------------------------------|
| Formula weight                                      | 644.14                                                        | 1034.74                                                       | 551.96                                                        | 726.62                                                        | 652.09                                                        | 487.88                                                        |
| Temperature (K)                                     | 293                                                           | 160                                                           | 180                                                           | 180                                                           | 293                                                           | 293                                                           |
| Space group                                         | <i>P</i> 1                                                    | <i>R</i> 3 <sub><i>c</i></sub>                                | <i>P</i> 2 <sub>1</sub> / <i>n</i>                            | <i>P</i> 2 <sub>1</sub> / <i>c</i>                            | <i>Pbcn</i>                                                   | <i>P</i> 2 <sub>1</sub> / <i>c</i>                            |
| <i>a</i> (Å)                                        | 8.3929(13)                                                    | 13.3415(3)                                                    | 10.4567(8)                                                    | 8.2460(4)                                                     | 8.3469(5)                                                     | 8.2563(13)                                                    |
| <i>b</i> (Å)                                        | 9.0045(15)                                                    | 13.3415(3)                                                    | 8.2415(5)                                                     | 12.1991(4)                                                    | 15.7421(7)                                                    | 8.2491(19)                                                    |
| <i>c</i> (Å)                                        | 10.0309(16)                                                   | 48.9618(11)                                                   | 13.9101(8)                                                    | 14.6014(6)                                                    | 22.5116(9)                                                    | 15.902(4)                                                     |
| α, (°)                                              | 86.465(13)                                                    | 90                                                            | 90                                                            | 90                                                            | 90                                                            | 90                                                            |
| β, (°)                                              | 84.490(13)                                                    | 90                                                            | 99.208(7)                                                     | 105.973(4)                                                    | 90                                                            | 100.91(2)                                                     |
| γ, (°)                                              | 65.635(16)                                                    | 120                                                           | 90                                                            | 90                                                            | 90                                                            | 90                                                            |
| Cell volume, (Å <sup>3</sup> )                      | 687.2(2)                                                      | 7547.4(4)                                                     | 1183.31(14)                                                   | 1412.11(10)                                                   | 2958.0(3)                                                     | 1063.5(4)                                                     |
| <i>Z</i>                                            | 1                                                             | 6                                                             | 2                                                             | 2                                                             | 4                                                             | 2                                                             |
| ρ <sub>calc</sub> (g/cm <sup>3</sup> )              | 1.557                                                         | 1.358                                                         | 1.549                                                         | 1.709                                                         | 1.464                                                         | 1.524                                                         |
| μ (mm <sup>-1</sup> )                               | 0.755                                                         | 0.647                                                         | 0.692                                                         | 1.147                                                         | 0.570                                                         | 0.753                                                         |
| Reflections collected/unique                        | 5142/2408                                                     | 10071/2021                                                    | 8240/2322                                                     | 9532/3251                                                     | 10062/2601                                                    | 2425/2425                                                     |
| GoF                                                 | 0.996                                                         | 1.060                                                         | 1.084                                                         | 1.047                                                         | 1.053                                                         | 1.104                                                         |
| Final <i>R</i> indices [ <i>I</i> > 2σ( <i>I</i> )] | <i>R</i> <sub>1</sub> =0.0591, <i>wR</i> <sub>2</sub> =0.0894 | <i>R</i> <sub>1</sub> =0.0441, <i>wR</i> <sub>2</sub> =0.1023 | <i>R</i> <sub>1</sub> =0.0538, <i>wR</i> <sub>2</sub> =0.0862 | <i>R</i> <sub>1</sub> =0.0403, <i>wR</i> <sub>2</sub> =0.0802 | <i>R</i> <sub>1</sub> =0.0537, <i>wR</i> <sub>2</sub> =0.0945 | <i>R</i> <sub>1</sub> =0.2410, <i>wR</i> <sub>2</sub> =0.5271 |
| <i>R</i> indices (all data)                         | <i>R</i> <sub>1</sub> =0.0944, <i>wR</i> <sub>2</sub> =0.1033 | <i>R</i> <sub>1</sub> =0.0577, <i>wR</i> <sub>2</sub> =0.1088 | <i>R</i> <sub>1</sub> =0.0768, <i>wR</i> <sub>2</sub> =0.0932 | <i>R</i> <sub>1</sub> =0.0519, <i>wR</i> <sub>2</sub> =0.0848 | <i>R</i> <sub>1</sub> =0.0890, <i>wR</i> <sub>2</sub> =0.1082 | <i>R</i> <sub>1</sub> =0.2663, <i>wR</i> <sub>2</sub> =0.5393 |
| CCDC                                                | 2161995                                                       | 2161996                                                       | 2161997                                                       | 2161994                                                       | 2161998                                                       | 2161993                                                       |

**Table S2.** Selected bond distances and angles of the solvatomorphs

| Compound                        | 1·2DMSO   | 1·7DMSO    | 1·2MeOH   | 1·2CHCl <sub>3</sub> | 1·2DMF·H <sub>2</sub> O | 1         |
|---------------------------------|-----------|------------|-----------|----------------------|-------------------------|-----------|
| <b>Distance, Å</b>              |           |            |           |                      |                         |           |
| Fe–N(1)                         | 1.959(3)  | 1.9674(18) | 1.955(2)  | 1.9600(19)           | 1.968(3)                | 1.991(14) |
| Fe–N(2)                         | 1.959(3)  | 1.9676(17) | 1.955(2)  | 1.9600(19)           | 1.968(3)                | 1.991(14) |
| Fe–N(3)                         | 1.952(3)  | 1.9676(17) | 1.958(2)  | 1.9468(18)           | 1.958(3)                | 1.931(18) |
| Fe–N(4)                         | 1.952(3)  | 1.9676(18) | 1.958(2)  | 1.9468(18)           | 1.958(3)                | 1.931(19) |
| Fe–N(5)                         | 1.964(3)  | 1.9676(17) | 1.972(2)  | 1.9597(18)           | 1.964(2)                | 1.950(15) |
| Fe–N(6)                         | 1.964(3)  | 1.9676(17) | 1.972(2)  | 1.9597(18)           | 1.964(2)                | 1.950(15) |
| <b>Angle, ° (average value)</b> |           |            |           |                      |                         |           |
| Cis (intra)                     | 88.27(13) | 87.91(7)   | 88.11(10) | 88.55(8)             | 88.16(11)               | 88.07(7)  |
| Cis (inter)                     | 91.73(13) | 92.09(7)   | 91.89(10) | 91.45(8)             | 91.84(11)               | 91.93(7)  |
| Trans                           | 180.0     | 180.00(9)  | 180.00(8) | 180.00(3)            | 180.0                   | 180.0     |

**Table S3.** Selected structural parameters comparison for tris(triazolyl)- and tris(pyrazolyl)borate ferrous complexes.

| Compound                       | [Fe(HB(1,2,3-tz) <sub>3</sub> ) <sub>2</sub> ] | [Fe(HB(1,2,4-tz) <sub>3</sub> ) <sub>2</sub> ] <sup>1</sup> | [Fe(HB(pz) <sub>3</sub> ) <sub>2</sub> ] <sup>2</sup> |
|--------------------------------|------------------------------------------------|-------------------------------------------------------------|-------------------------------------------------------|
| Space group                    | <i>P</i> 2 <sub>1</sub> / <i>c</i>             | <i>Pbca</i>                                                 | <i>P</i> 2 <sub>1</sub> / <i>c</i>                    |
| <b>Distance, Å</b>             |                                                |                                                             |                                                       |
| Fe–N(1)                        | 1.991(14)                                      | 1.9822(11)                                                  | 1.973(3)                                              |
| Fe–N(2)                        | 1.991(14)                                      | 1.9822(11)                                                  | 1.980(3)                                              |
| Fe–N(3)                        | 1.931(18)                                      | 1.9754(11)                                                  | 1.972(3)                                              |
| Fe–N(4)                        | 1.931(18)                                      | 1.9754(11)                                                  | 1.979(3)                                              |
| Fe–N(5)                        | 1.950(15)                                      | 1.9758(11)                                                  | 1.960(3)                                              |
| Fe–N(6)                        | 1.950(15)                                      | 1.9758(11)                                                  | 1.971(4)                                              |
| Fe···Fe (along <i>a</i> -axis) | 8.2563(13)                                     | 7.97820(18)                                                 | 8.4403(13)                                            |
| Fe···Fe (along <i>b</i> -axis) | 8.2491(19)                                     | 9.8678(2)                                                   | 11.606(2)                                             |
| Fe···Fe (along <i>c</i> -axis) | 8.9571(18)                                     | 8.7654(2)                                                   | 8.674(2)                                              |
| <b>Volume, Å<sup>3</sup></b>   |                                                |                                                             |                                                       |
| Coordination octahedron        | 9.97                                           | 10.30                                                       | 10.21                                                 |
| Unit cell volume per molecule  | 516.6                                          | 531.8                                                       | 560.1                                                 |

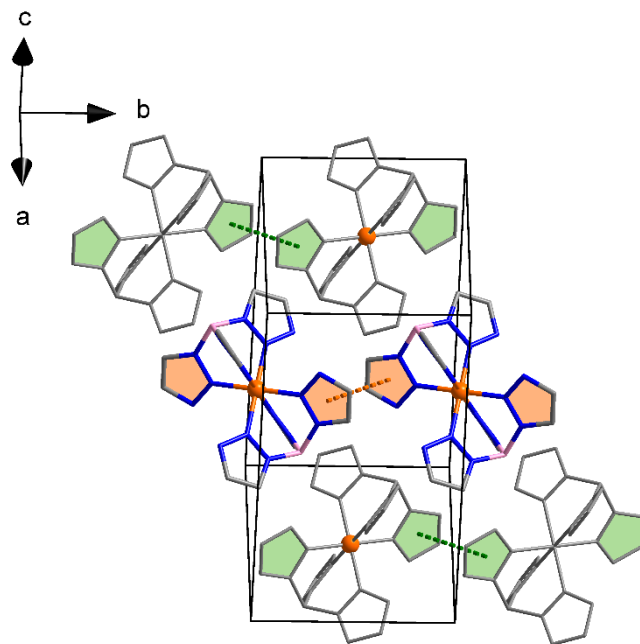

**Figure S1.** Unit cell of **1** with displayed  $\pi$ - $\pi$  stacking interactions propagating along two opposite directions within  $ab$ -plane. Hydrogen atoms are omitted for clarity.

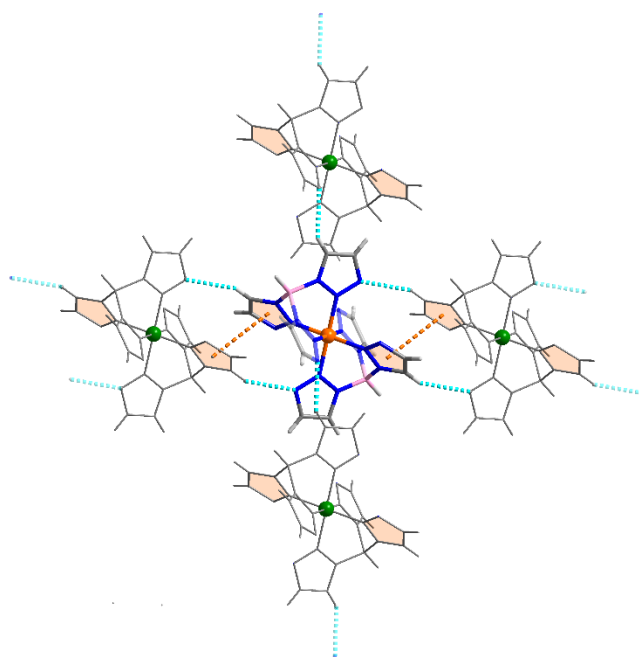

**Figure S2.** Crystal packing in **1** with intermolecular interactions ( $\pi$ - $\pi$  stacking interactions are shown only for one direction).

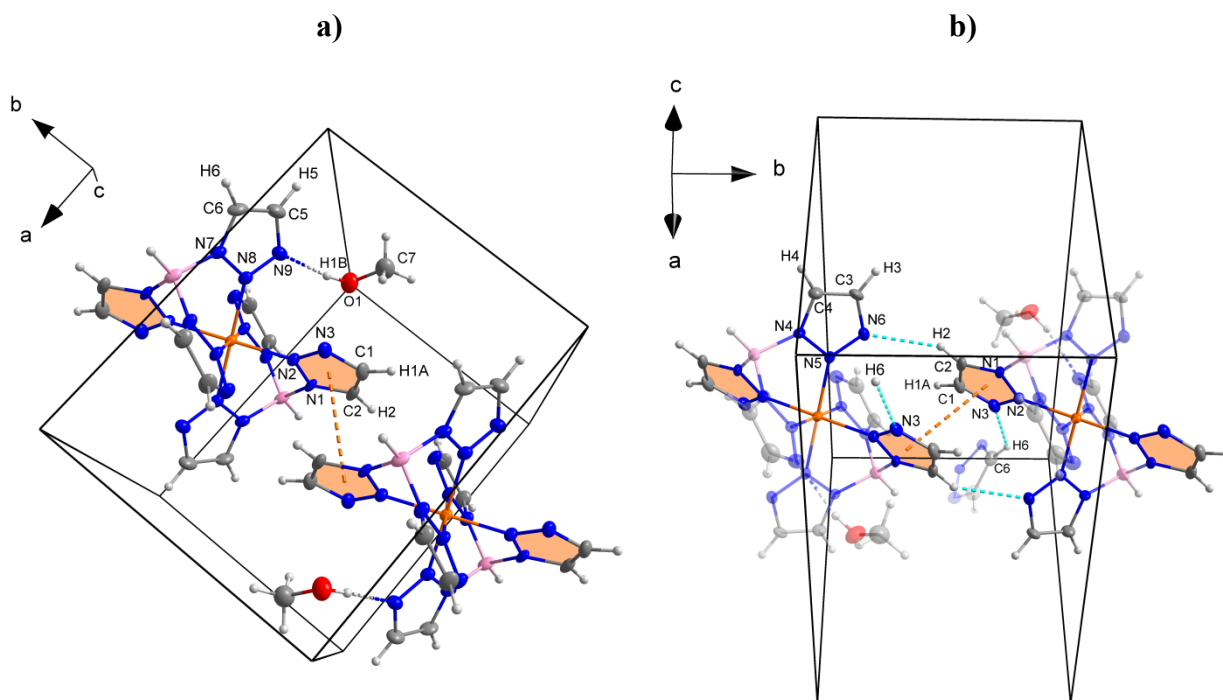

**Figure S3.** Fragments of  $1 \cdot 2\text{MeOH}$  crystal structure, where hydrogen bonding between  $\text{FeL}_2$  and  $\text{MeOH}$  molecules (**a**),  $\text{C}-\text{H} \cdots \text{N}$  interactions (**b**) and intermolecular  $\pi$ - $\pi$  stacking (**a**, **b**) are shown. Parts of the molecules in **b** are omitted or made transparent for clarity.

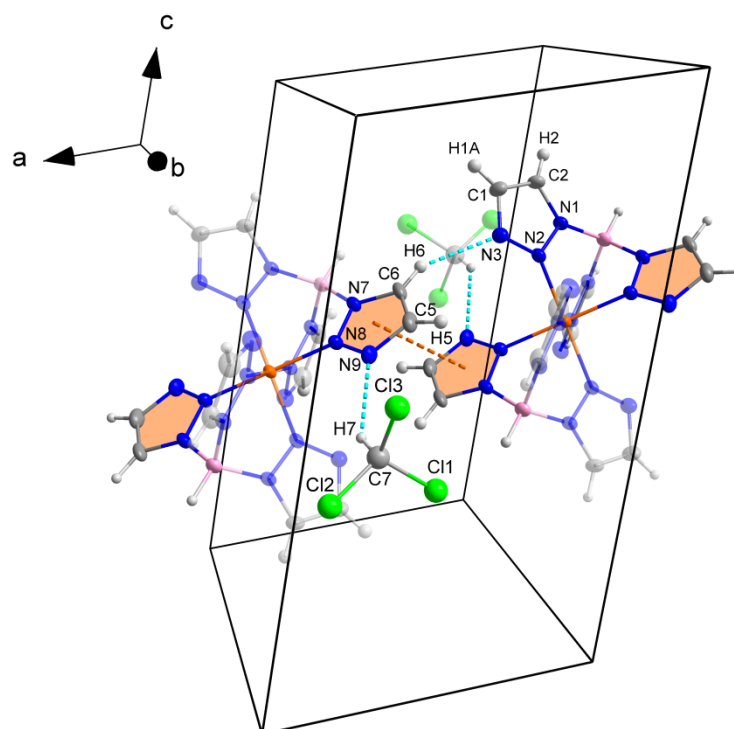

**Figure S4.**  $1 \cdot 2\text{CHCl}_3$  crystal structure fragment with intermolecular interactions between the complex and the solvent molecules. Parts of  $[\text{Fe}(\text{HB}(1,2,3\text{-tz})_3)_2]$  molecules are represented transparent for clarity.

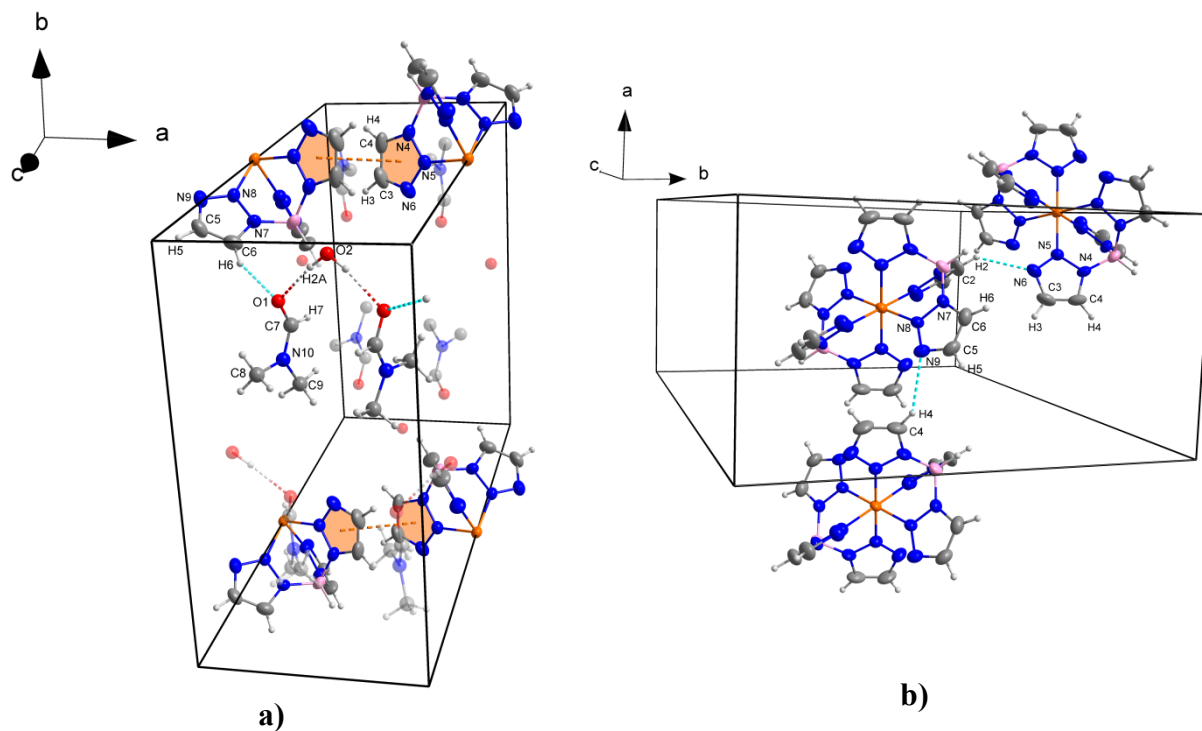

**Figure S5.** Fragments of **1·2DMF·H<sub>2</sub>O** crystal structure representing intermolecular C-H...O contacts,  $\pi$ - $\pi$  stacking (a) and C-H...N (b) interactions.

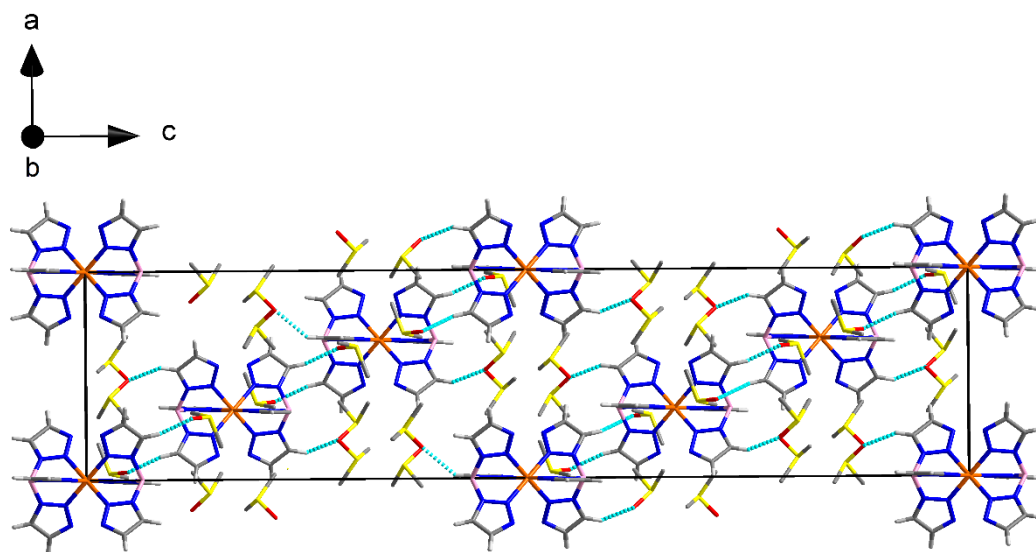

**Figure S6.** Crystal structure (packing diagram) of **1·7DMSO** solvatomorph with intermolecular interactions shown. Hydrogen atoms of the disordered CH<sub>3</sub>-moieties of the solvent are omitted for clarity.

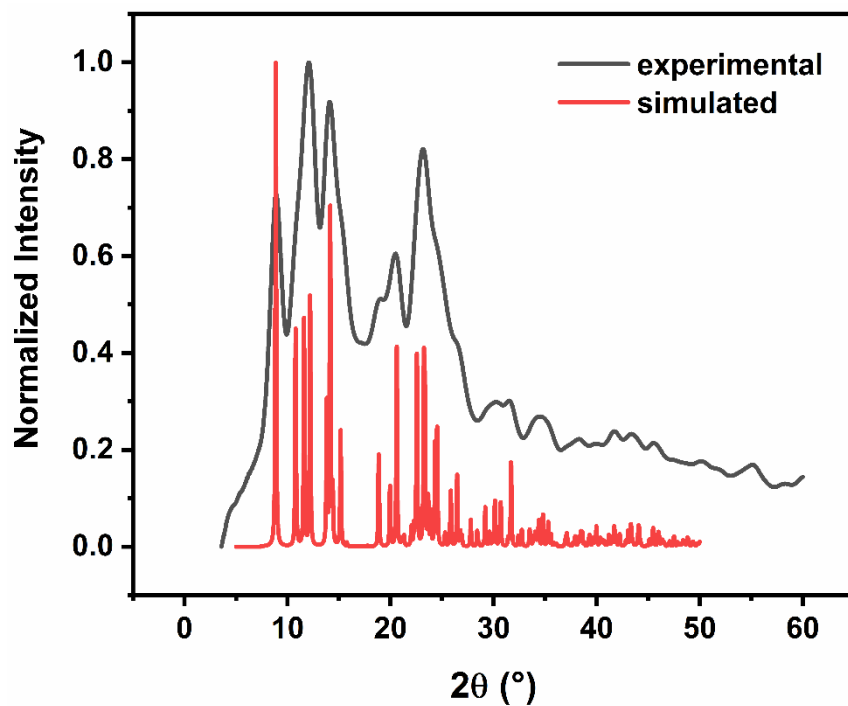

**Figure S7.** Simulated PXR D pattern of **1·2DMSO** versus experimental PXR D pattern recorded for desolvated **1·7DMSO** crystals.

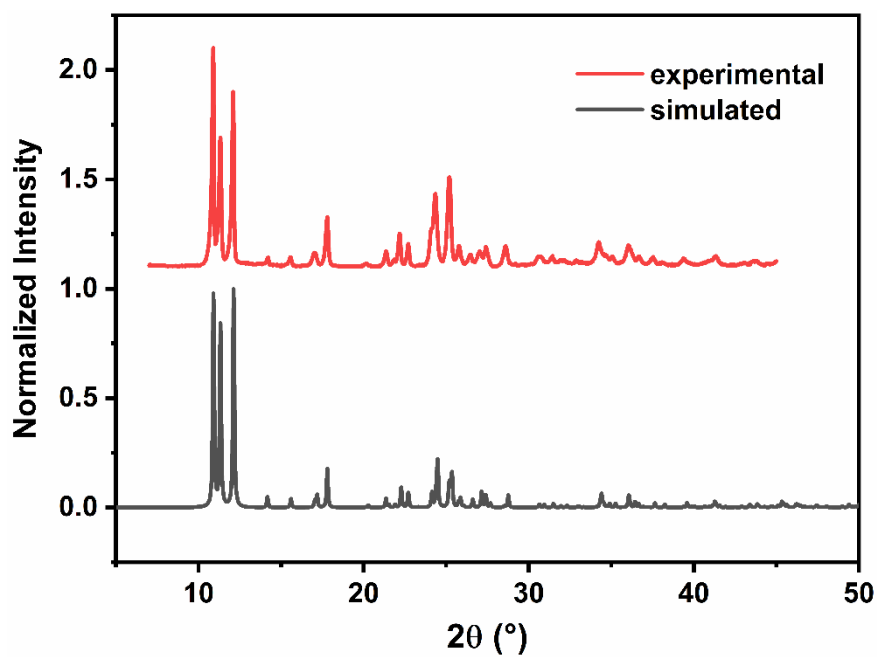

**Figure S8.** Experimental and simulated PXR D patterns of **1**.

## II- Raman Spectroscopy

The Raman spectra were collected for dehydrated crystal of **1** in 303-433 K range (Fig. S9a). The spectra revealed reversibility upon cooling to room temperature at the end of the thermal cycle. Intensity of the signals in 1160-1280  $\text{cm}^{-1}$  region of the spectra tends to decrease upon heating, that makes them useful to track the spin crossover properties. Plotting integral intensity ratio of the bands at 1205  $\text{cm}^{-1}$  and 1263  $\text{cm}^{-1}$  versus temperature yields the spin crossover curve, that is in accordance with magnetic measurements' data (Figure S9b).

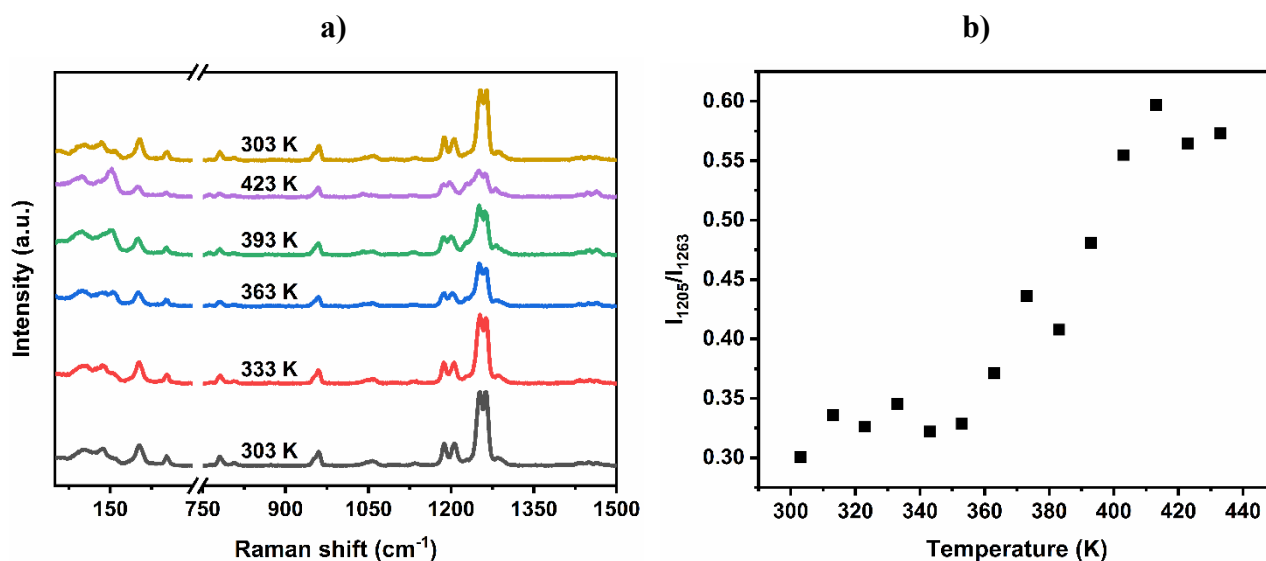

**Figure S9.** Raman spectra of **1** at different temperatures (a) and plot of 1205/1263  $\text{cm}^{-1}$  bands' integral intensity ratio as a function of temperature (b).

### III- Mössbauer spectroscopy

Mössbauer spectra were recorded for  $1 \cdot 12\text{H}_2\text{O}$ , intermediate phase obtained by heating of the hydrate at 328 K for 1 h and **1** at room temperature (Fig. S10). The spectra of the hydrate compound and the polymorphs display one doublet with hyperfine parameters indicating low spin state of Fe(II) in the examined samples: isomeric shift ( $\delta^{LS}$ ) values range from 0.632(3)  $\text{mm s}^{-1}$  to 0.649(3)  $\text{mm s}^{-1}$ , while quadrupole splitting ( $\Delta E_{\text{q}}^{LS}$ ) lies in 0.144(5)-0.207(6)  $\text{mm s}^{-1}$  range.

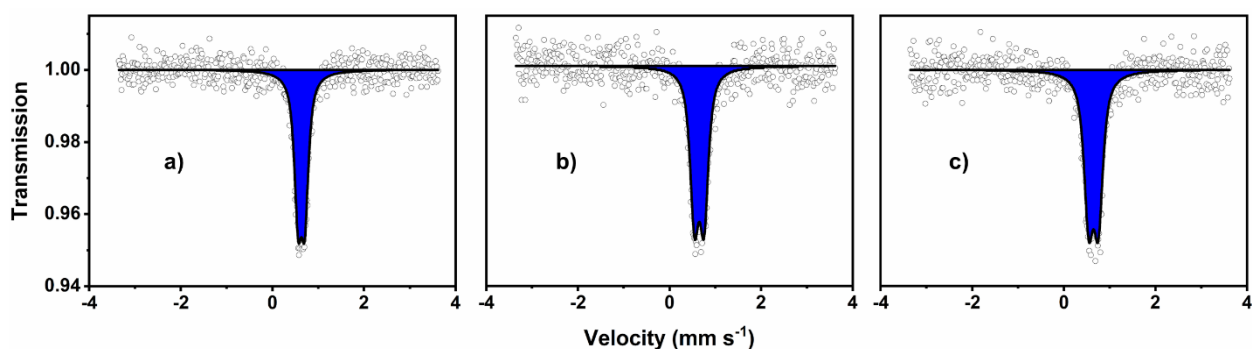

**Figure S10.** Room temperature Mössbauer spectra of crystalline  $1 \cdot 12\text{H}_2\text{O}$  (a), intermediate phase (b) and powder of **1** (c).

### IV- References

- 1 S. Rat, K. Ridier, L. Vendier, G. Molnár, L. Salmon and A. Bousseksou, *CrystEngComm*, 2017, **19**, 3271–3280.
- 2 J. D. Oliver, B. B. Hutchinson, D. F. Mullica and W. O. Milligan, *Inorg. Chem.*, 1980, **19**, 165–169.
